# Supplementary material for: The Expression Kinetics and Immunogenicity of Lipid Nanoparticles Delivering Plasmid DNA and mRNA in Mice
Source: MDPI journal article supplement (doi:10.3390/vaccines11101580), 2023-10-11
Supplement: s1 [file vaccines-2561858-SI.pdf › vaccines-2561858-SI.pdf]

### Supplementary Materials

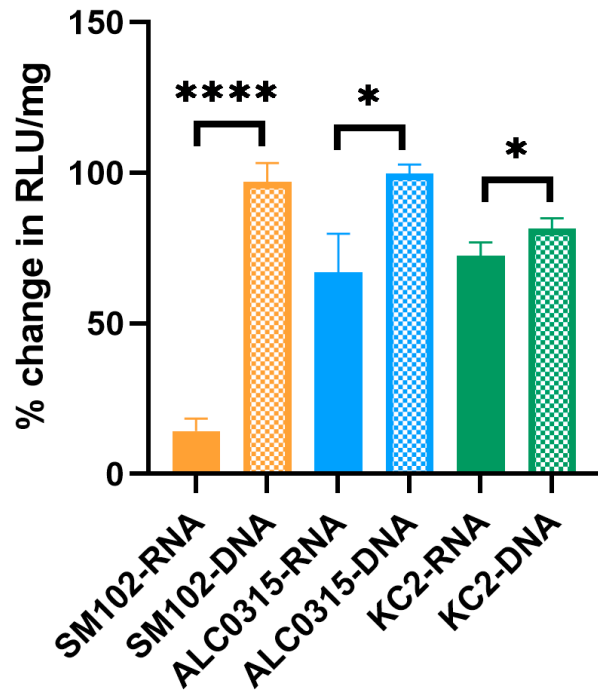

**Figure S1.** DNA-LNPs are more thermostable than RNA-LNPs. LNPs encapsulating mRNA encoding firefly luciferase were stored at 37°C for seven days and then used to transfect HEK293T cells according to the *in vitro* transfection assay protocol described in the methods section. % change in RLU/mg represents the change in RLU/mg when compared to that of the freshly prepared LNP formulation on day 0. RLU: relative luminescence units. Error bars represent standard deviation (SD). \* p-value < 0.05, \*\*\*\* < 0.0001.
